# Supplementary material for: Manual Ventilation and Sustained Lung Inflation in an Experimental Model: Influence of Equipment Type and Operator’s Training
Source: PubMed Central journal article supplement (PMC4747546; doi:10.1371/journal.pone.0148475), 2016-02-09
Supplement: pone.0148475.s001.pdf [file pone.0148475.s001.pdf]

| Order | Group | Age | Gender | Time since graduation (years) | Time since completion of residency (years) | Experience in neonatology (years) | Title of specialist in neonatology | Time as an instructor |
|-------|-------|-----|--------|-------------------------------|--------------------------------------------|-----------------------------------|------------------------------------|-----------------------|
| 1     | I     | 48  | M      | 25                            | 22                                         | 22                                | S                                  | 13                    |
| 2     | I     | 48  | F      | 24                            | 22                                         | 20                                | S                                  | 11                    |
| 3     | I     | 45  | M      | 22                            | 20                                         | 20                                | N                                  | 4                     |
| 5     | I     | 44  | F      | 20                            | 16                                         | 15                                | S                                  | 14                    |
| 7     | I     | 34  | M      | 9                             | 6                                          | 6                                 | S                                  | 1                     |
| 8     | I     | 47  | F      | 23                            | 20                                         | 20                                | S                                  | 15                    |
| 9     | I     | 46  | F      | 21                            | 18                                         | 18                                | N                                  | 1                     |
| 10    | I     | 49  | M      | 23                            | 20                                         | 20                                | N                                  | 3                     |
| 12    | I     | 42  | F      | 17                            | 14                                         | 13                                | S                                  | 10                    |
| 13    | I     | 47  | F      | 24                            | 21                                         | 21                                | S                                  | 14                    |
| 14    | I     | 51  | F      | 28                            | 24                                         | 20                                | S                                  | 15                    |
| 15    | I     | 59  | M      | 36                            | 34                                         | 34                                | S                                  | 16                    |
| 16    | I     | 48  | M      | 25                            | 23                                         | 23                                | S                                  | 10                    |
| 17    | I     | 52  | M      | 28                            | 25                                         | 25                                | S                                  | 15                    |
| 18    | I     | 46  | F      | 23                            | 20                                         | 20                                | S                                  | 15                    |
| 19    | I     | 56  | F      | 32                            | 28                                         | 28                                | S                                  | 15                    |
| 20    | I     | 59  | F      | 35                            | 32                                         | 31                                | S                                  | 16                    |
| 21    | I     | 57  | M      | 34                            | 32                                         | 23                                | S                                  | 15                    |
| 22    | I     | 47  | M      | 24                            | 20                                         | 20                                | S                                  | 17                    |
| 24    | N     | 24  | F      | 1                             | 0                                          | 0,5                               | N                                  | 0                     |
| 25    | N     | 46  | F      | 22                            | 18                                         | 19                                | S                                  | 0                     |
| 26    | N     | 45  | M      | 20                            | 9                                          | 10                                | N                                  | 0                     |
| 28    | N     | 31  | F      | 5                             | 1                                          | 1                                 | S                                  | 0                     |
| 29    | N     | 40  | F      | 16                            | 13                                         | 13                                | S                                  | 0                     |
| 30    | N     | 34  | M      | 10                            | 7                                          | 10                                | S                                  | 0                     |
| 31    | N     | 31  | F      | 8                             | 4                                          | 4                                 | S                                  | 0                     |
| 32    | N     | 32  | F      | 6                             | 0                                          | 3                                 | S                                  | 0                     |
| 33    | N     | 66  | F      | 38                            | 36                                         | 38                                | N                                  | 0                     |
| 34    | N     | 37  | F      | 13                            | 10                                         | 3                                 | N                                  | 0                     |
| 35    | N     | 34  | F      | 9                             | 6                                          | 9                                 | S                                  | 0                     |
| 36    | N     | 33  | F      | 8                             | 6                                          | 5                                 | N                                  | 0                     |
| 37    | N     | 53  | F      | 29                            | 26                                         | 0                                 | N                                  | 0                     |
| 38    | N     | 36  | M      | 9                             | 5                                          | 6                                 | S                                  | 0                     |
| 39    | I     | 40  | F      | 16                            | 13                                         | 15                                | S                                  | 7                     |
| 40    | N     | 29  | F      | 5                             | 3                                          | 3                                 | S                                  | 0                     |
| 41    | N     | 29  | F      | 5                             | 0                                          | 2                                 | N                                  | 0                     |
| 42    | N     | 34  | F      | 5                             | 1                                          | 3                                 | N                                  | 0                     |
| 43    | N     | 34  | F      | 10                            | 6                                          | 6                                 | N                                  | 0                     |
| 44    | N     | 48  | M      | 23                            | 21                                         | 21                                | N                                  | 0                     |
| 45    | N     | 33  | M      | 8                             | 1                                          | 3                                 | N                                  | 0                     |
| 46    | N     | 53  | M      | 29                            | 27                                         | 20                                | S                                  | 0                     |
| 47    | I     | 44  | F      | 20                            | 15                                         | 17                                | S                                  | 13                    |
| 48    | N     | 38  | F      | 14                            | 10                                         | 10                                | S                                  | 0                     |
| 50    | I     | 52  | F      | 27                            | 25                                         | 25                                | S                                  | 6                     |
| 52    | I     | 45  | F      | 19                            | 15                                         | 15                                | S                                  | 5                     |
| 53    | I     | 52  | F      | 29                            | 27                                         | 18                                | S                                  | 8                     |
| 54    | I     | 42  | F      | 19                            | 17                                         | 10                                | S                                  | 10                    |

|     |   |    |   |    |     |     |   |     |
|-----|---|----|---|----|-----|-----|---|-----|
| 58  | N | 38 | F | 11 | 7   | 7   | S | 0   |
| 59  | N | 41 | F | 18 | 10  | 10  | N | 0   |
| 60  | N | 47 | F | 23 | 19  | 19  | S | 0   |
| 61  | N | 28 | F | 4  | 1   | 1   | N | 0   |
| 62  | I | 33 | F | 8  | 3   | 5   | S | 5   |
| 63  | N | 29 | F | 5  | 1   | 3   | N | 0   |
| 65  | I | 43 | M | 20 | 17  | 17  | S | 0,5 |
| 66  | I | 46 | M | 22 | 19  | 18  | S | 2   |
| 68  | N | 43 | F | 18 | 0   | 8   | N | 0   |
| 69  | I | 45 | F | 22 | 18  | 18  | S | 15  |
| 70  | N | 31 | F | 7  | 5   | 5   | S | 0   |
| 71  | I | 52 | M | 27 | 25  | 15  | N | 2   |
| 72  | I | 38 | F | 12 | 8   | 8   | N | 1   |
| 73  | N | 56 | F | 31 | 27  | 27  | N | 0   |
| 74  | I | 53 | F | 31 | 26  | 26  | N | 2   |
| 75  | N | 30 | M | 4  | 0,8 | 0,8 | N | 0   |
| 76  | N | 33 | F | 5  | 0,8 | 0,8 | N | 0   |
| 77  | I | 44 | F | 20 | 17  | 17  | S | 13  |
| 78  | I | 56 | F | 32 | 30  | 25  | N | 1   |
| 79  | N | 32 | F | 6  | 1,8 | 3   | N | 0   |
| 80  | N | 30 | F | 6  | 0   | 1   | N | 0   |
| 81  | N | 29 | F | 4  | 0   | 1,5 | N | 0   |
| 82  | I | 56 | F | 33 | 30  | 15  | S | 1   |
| 83  | N | 44 | F | 19 | 16  | 16  | S | 0   |
| 84  | N | 62 | M | 33 | 0   | 33  | N | 0   |
| 85  | I | 38 | F | 12 | 8   | 8   | S | 5   |
| 86  | I | 31 | F | 9  | 6   | 6   | S | 1   |
| 87  | I | 52 | F | 29 | 27  | 26  | S | 15  |
| 88  | N | 49 | M | 25 | 22  | 22  | N | 0   |
| 89  | N | 35 | M | 10 | 7   | 8   | S | 0   |
| 90  | N | 48 | M | 23 | 21  | 15  | S | 0   |
| 91  | N | 64 | M | 37 | 35  | 20  | S | 0   |
| 92  | N | 40 | F | 14 | 10  | 10  | N | 0   |
| 93  | N | 50 | F | 27 | 24  | 24  | S | 0   |
| 94  | N | 31 | F | 3  | 1   | 1   | N | 0   |
| 95  | I | 48 | F | 26 | 22  | 22  | N | 0,5 |
| 96  | N | 54 | M | 29 | 26  | 23  | S | 0   |
| 97  | N | 54 | F | 30 | 28  | 24  | N | 0   |
| 98  | I | 44 | F | 20 | 17  | 17  | S | 15  |
| 99  | N | 38 | F | 16 | 12  | 12  | S | 0   |
| 100 | I | 35 | F | 12 | 6   | 10  | S | 2   |
| 101 | I | 41 | F | 16 | 13  | 14  | S | 10  |
| 102 | N | 52 | F | 20 | 27  | 24  | S | 0   |
| 103 | N | 52 | F | 29 | 26  | 25  | S | 0   |
| 104 | N | 64 | F | 37 | 35  | 10  | N | 0   |
| 105 | I | 49 | F | 26 | 23  | 23  | S | 15  |
| 106 | N | 41 | F | 17 | 14  | 14  | S | 0   |
| 107 | I | 44 | F | 20 | 17  | 12  | N | 12  |
| 108 | N | 42 | F | 23 | 19  | 13  | N | 0   |
| 109 | N | 37 | F | 13 | 9   | 9   | S | 0   |
| 110 | I | 56 | F | 31 | 28  | 30  | N | 2   |
| 111 | N | 55 | F | 34 | 31  | 31  | S | 0   |

|     |   |    |   |     |    |    |   |    |
|-----|---|----|---|-----|----|----|---|----|
| 112 | N | 56 | M | 168 | 32 | 30 | N | 0  |
| 114 | I | 51 | M | 24  | 22 | 22 | N | 15 |
| 115 | I | 45 | M | 19  | 16 | 8  | N | 2  |
| 116 | N | 48 | F | 23  | 19 | 18 | N | 0  |
| 117 | N | 34 | F | 10  | 7  | 7  | S | 0  |
| 118 | I | 47 | F | 23  | 21 | 21 | S | 16 |
| 119 | N | 40 | F | 22  | 18 | 18 | S | 0  |
| 120 | I | 40 | F | 14  | 11 | 0  | N | 4  |
| 121 | N | 38 | F | 15  | 10 | 10 | N | 0  |
| 122 | I | 48 | F | 24  | 21 | 10 | N | 11 |
| 123 | I | 53 | F | 32  | 28 | 28 | S | 15 |

Number of newborns treated in

| Order | ICU | Public hospital | Private hospital | University hospital | Number of newborns treated in previous month | Use of T-piece |
|-------|-----|-----------------|------------------|---------------------|----------------------------------------------|----------------|
| 1     | S   | S               | S                | N                   | 6                                            | S              |
| 2     | S   | S               | S                | S                   | 30                                           | N              |
| 3     | S   | S               | S                | S                   | 50                                           | S              |
| 5     | S   | N               | S                | N                   | 30                                           | S              |
| 7     | S   | S               | S                | S                   | 100                                          | N              |
| 8     | S   | S               | S                | S                   | 20                                           | N              |
| 9     | S   | S               | S                | S                   | 15                                           | N              |
| 10    | S   | S               | S                | S                   | 40                                           | N              |
| 12    | S   | N               | S                | N                   | 50                                           | S              |
| 13    | S   | S               | S                | S                   | 20                                           | S              |
| 14    | S   | S               | S                | N                   | 35                                           | N              |
| 15    | S   | S               | N                | S                   | 0                                            | N              |
| 16    | S   | S               | S                | N                   | 20                                           | S              |
| 17    | S   | S               | N                | S                   | 10                                           | S              |
| 18    | S   | S               | N                | S                   | 5                                            | N              |
| 19    | S   | S               | N                | S                   | 2                                            | S              |
| 20    | S   | N               | N                | S                   | 5                                            | S              |
| 21    | S   | N               | S                | S                   | 2                                            | S              |
| 22    | S   | S               | S                | S                   | 60                                           | S              |
| 24    | S   | N               | S                | S                   | 20                                           | N              |
| 25    | S   | N               | S                | N                   | 10                                           | N              |
| 26    | S   | S               | S                | N                   | 50                                           | N              |
| 28    | S   | S               | S                | N                   | 50                                           | S              |
| 29    | S   | S               | S                | S                   | 15                                           | N              |
| 30    | S   | N               | N                | N                   | 100                                          | N              |
| 31    | S   | S               | S                | S                   | 20                                           | S              |
| 32    | S   | S               | S                | S                   | 80                                           | S              |
| 33    | S   | N               | N                | N                   | 40                                           | N              |
| 34    | S   | N               | S                | N                   | 5                                            | N              |
| 35    | S   | N               | S                | N                   | 10                                           | S              |
| 36    | N   | S               | N                | N                   | 12                                           | N              |
| 37    | N   | N               | N                | N                   | 0                                            | N              |
| 38    | S   | S               | S                | S                   | 15                                           | S              |
| 39    | S   | S               | S                | S                   | 20                                           | S              |
| 40    | S   | S               | S                | S                   | 15                                           | S              |
| 41    | S   | S               | S                | S                   | 125                                          | S              |

|     |   |   |   |   |     |   |
|-----|---|---|---|---|-----|---|
| 42  | S | S | S | S | 40  | S |
| 43  | S | N | S | N | 40  | N |
| 44  | S | S | N | N | 60  | N |
| 45  | S | S | S | S | 20  | N |
| 46  | S | S | S | N | 30  | N |
| 47  | S | S | N | S | 0   | N |
| 48  | S | S | N | S | 32  | N |
| 50  | S | N | S | N | 12  | S |
| 52  | S | S | N | N | 10  | S |
| 53  | S | S | N | S | 10  | N |
| 54  | S | S | S | S | 30  | S |
| 58  | S | S | S | N | 40  | N |
| 59  | S | N | N | N | 15  | N |
| 60  | S | S | S | S | 50  | S |
| 61  | S | S | S | N | 50  | S |
| 62  | S | S | N | N | 16  | S |
| 63  | S | S | S | N | 100 | S |
| 65  | S | S | N | S | 4   | S |
| 66  | S | S | N | S | 10  | S |
| 68  | S | S | N | N | 8   | S |
| 69  | S | S | S | S | 20  | S |
| 70  | S | N | S | N | 15  | S |
| 71  | S | N | S | S | 20  | N |
| 72  | S | S | S | S | 15  | N |
| 73  | S | S | N | N | 32  | N |
| 74  | S | S | S | N | 30  | N |
| 75  | S | S | N | N | 30  | N |
| 76  | S | S | S | N | 50  | N |
| 77  | S | S | S | S | 35  | S |
| 78  | S | S | S | N | 60  | N |
| 79  | S | S | N | S | 30  | N |
| 80  | S | N | N | N | 20  | N |
| 81  | N | S | N | N | 10  | N |
| 82  | S | S | S | N | 64  | N |
| 83  | S | N | S | S | 12  | N |
| 84  | S | S | N | N | 10  | N |
| 85  | S | S | N | N | 40  | N |
| 86  | S | S | N | S | 20  | N |
| 87  | S | S | N | S | 50  | N |
| 88  | S | S | S | N | 5   | N |
| 89  | S | N | N | N | 1   | N |
| 90  | S | S | N | N | 30  | S |
| 91  | S | N | S | N | 0   | N |
| 92  | S | S | N | N | 24  | N |
| 93  | S | S | S | S | 12  | S |
| 94  | S | S | N | S | 20  | S |
| 95  | S | S | N | N | 10  | N |
| 96  | S | S | S | S | 150 | N |
| 97  | N | S | S | N | 56  | N |
| 98  | S | S | N | N | 30  | N |
| 99  | S | S | S | S | 15  | N |
| 100 | S | N | S | S | 10  | N |

|     |   |   |   |   |     |   |
|-----|---|---|---|---|-----|---|
| 101 | S | S | N | S | 20  | N |
| 102 | S | N | S | N | 30  | N |
| 103 | S | N | S | N | 4   | N |
| 104 | S | S | N | N | 40  | N |
| 105 | S | S | S | N | 40  | N |
| 106 | S | S | S | S | 30  | S |
| 107 | S | S | N | N | 300 | N |
| 108 | S | S | S | S | 40  | S |
| 109 | S | S | N | S | 30  | N |
| 110 | N | N | N | N | 30  | N |
| 111 | S | N | N | S | 25  | S |
| 112 | N | N | N | N | 8   | N |
| 114 | S | S | S | N | 30  | N |
| 115 | S | S | S | N | 40  | N |
| 116 | N | S | S | N | 10  | N |
| 117 | S | S | N | S | 10  | N |
| 118 | S | S | S | S | 80  | N |
| 119 | S | S | S | S | 28  | S |
| 120 | N | S | N | S | 1   | N |
| 121 | S | S | N | S | 30  | N |
| 122 | N | N | N | N | 0   | N |
| 123 | S | N | S | N | 3   | S |
