# Supplementary material for: Manual Ventilation and Sustained Lung Inflation in an Experimental Model: Influence of Equipment Type and Operator’s Training
Source: PubMed Central journal article supplement (PMC4747546; doi:10.1371/journal.pone.0148475), 2016-02-09
Supplement: pone.0148475.s002.pdf [file pone.0148475.s002.pdf]

| Order | PIP-A x | PIP-A sd | Vt-A x | Vt-A sd | PIP-T x | PIP-T sd | PEEP-T x | PEEP-T sd |
|-------|---------|----------|--------|---------|---------|----------|----------|-----------|
| 1     | 21,43   | 3,86     | 30,9   | 6,22    | 20,55   | 0,28     | 7        | 0,08      |
| 2     | 24,18   | 2,26     | 37,33  | 3,58    | 20,71   | 0,17     | 7,08     | 0,04      |
| 3     | 37,78   | 1,49     | 56,4   | 0,7     | 20,25   | 0,08     | 5,7      | 0,1       |
| 5     | 22,43   | 5,03     | 41,35  | 6,43    | 19,96   | 0,2      | 4,93     | 0,05      |
| 7     | 16,86   | 2,33     | 25,2   | 3,33    | 19,61   | 0,31     | 5,63     | 0,12      |
| 8     | 14,76   | 2,75     | 22,46  | 1,07    | 20,61   | 0,11     | 5,3      | 0,06      |
| 9     | 24,1    | 2,58     | 28,15  | 3,48    | 19,76   | 0,23     | 5,08     | 0,02      |
| 10    | 30,56   | 3,75     | 50,45  | 2,55    | 19,63   | 0,1      | 5,48     | 0,11      |
| 12    | 24      | 1,78     | 27,58  | 1,13    | 20,05   | 0,08     | 5        | 0         |
| 13    | 14,88   | 2,84     | 19,46  | 2,39    | 19,9    | 0,1      | 5,23     | 0,25      |
| 14    | 10,21   | 4,69     | 15,08  | 1,44    | 16,1    | 0,2      | 4,9      | 0         |
| 15    | 25,18   | 4,58     | 39     | 6,33    | 19,5    | 0,34     | 5,3      | 0         |
| 16    | 15,43   | 1,57     | 21,23  | 5,63    | 20,08   | 0,22     | 5,11     | 0,04      |
| 17    | 23,65   | 1,73     | 42,05  | 5,42    | 19,8    | 0,45     | 3,4      | 0         |
| 18    | 10,9    | 6,24     | 15,41  | 9       | 19,31   | 1,58     | 5,1      | 0         |
| 19    | 19,91   | 3,74     | 32,76  | 6,49    | 19,78   | 0,04     | 4,81     | 0,07      |
| 20    | 24,58   | 1,56     | 37,31  | 3,61    | 19,98   | 0,31     | 3,95     | 0,1       |
| 21    | 22,8    | 1,86     | 41,13  | 4,62    | 20,36   | 0,19     | 5,15     | 0,08      |
| 22    | 14,18   | 1,09     | 22,71  | 1,81    | 19,31   | 0,38     | 4,9      | 0         |
| 24    | 17,3    | 1,8      | 20,1   | 5,14    | 16,63   | 0,08     | 5,2      | 0         |
| 25    | 16,71   | 1,24     | 26,58  | 3,77    | 16,16   | 0,1      | 4,98     | 0,04      |
| 26    | 29,6    | 2,39     | 41,95  | 4,01    | 18,21   | 0,16     | 5,1      | 0,06      |
| 28    | 27,66   | 1,36     | 39,31  | 1,2     | 19,91   | 0,11     | 5,16     | 0,05      |
| 29    | 27,08   | 3,04     | 35,68  | 2,54    | 19,83   | 0,08     | 5,1      | 0         |
| 30    | 19,18   | 2,04     | 29,35  | 1,46    | 27,55   | 0,77     | 5,25     | 0,15      |
| 31    | 22,53   | 2,09     | 31,66  | 2,38    | 18,65   | 1,83     | 5,78     | 0,73      |
| 32    | 29,96   | 4,42     | 48,53  | 6,88    | 21,38   | 0,21     | 5,18     | 0,11      |
| 33    | 15,18   | 1,91     | 17,45  | 2,46    | 20,83   | 0,22     | 6,11     | 0,11      |
| 34    | 18,66   | 3,37     | 22,96  | 5,65    | 15,23   | 0,1      | 5,15     | 0,05      |
| 35    | 27,18   | 3,36     | 43,89  | 4,91    | 14,88   | 0,04     | 4,88     | 0,07      |
| 36    | 25,28   | 3,59     | 47,2   | 9,1     | 30,23   | 0,26     | 5,3      | 0         |
| 37    | 26,98   | 3,16     | 51,51  | 6,19    | 20,81   | 0,27     | 5,1      | 0,1       |
| 38    | 25,31   | 1,51     | 36,94  | 4,75    | 24,86   | 0,05     | 5,4      | 0         |
| 39    | 17,66   | 0,38     | 30,35  | 2,5     | 18,9    | 0,1      | 5,4      | 0,16      |
| 40    | 17,61   | 2,29     | 26,66  | 1,97    | 19,75   | 0,05     | 5,11     | 0,04      |
| 41    | 16,01   | 0,98     | 23,99  | 3,21    | 20      | 0,1      | 5,3      | 0         |
| 42    | 23,5    | 2,25     | 38,67  | 4,9     | 19,43   | 0,2      | 6,1      | 0         |
| 43    | 19,08   | 2,32     | 32,63  | 4,24    | 18,78   | 0,04     | 6,23     | 0,16      |
| 44    | 34,25   | 1,17     | 44,96  | 0,41    | 21,95   | 0,23     | 5,06     | 0,05      |
| 45    | 24,33   | 1,26     | 34,65  | 1,32    | 18,35   | 0,08     | 5,2      | 0,06      |
| 46    | 17,21   | 1,06     | 27,37  | 1,88    | 16,8    | 0,08     | 5,21     | 0,04      |
| 47    | 25,65   | 2,81     | 42,45  | 5,73    | 16,8    | 0        | 5,1      | 0         |
| 48    | 19,1    | 4,03     | 28,43  | 7,15    | 19,56   | 0,41     | 5        | 0         |
| 50    | 24,61   | 2,06     | 37,45  | 4,63    | 20      | 0        | 5,2      | 0         |
| 52    | 19      | 2,44     | 31,49  | 2,84    | 20,28   | 0,04     | 5        | 0         |
| 53    | 17,5    | 4,04     | 19,78  | 7,67    | 21,26   | 0,47     | 4,85     | 1,16      |
| 54    | 26,73   | 3,21     | 47,9   | 3,72    | 20,46   | 0,15     | 5,21     | 0,04      |
| 58    | 24,66   | 2,16     | 20,79  | 1,03    | 19,88   | 0,11     | 4,9      | 0,06      |
| 59    | 25,03   | 1,69     | 21,77  | 3,86    | 20,36   | 0,08     | 5        | 0         |
| 60    | 31,15   | 2,5      | 32,86  | 2,17    | 19,98   | 0,04     | 4,98     | 0,04      |
| 61    | 24,83   | 1,16     | 35,53  | 2,71    | 19,33   | 0,12     | 4,91     | 0,04      |

|     |       |      |       |      |       |      |      |      |
|-----|-------|------|-------|------|-------|------|------|------|
| 62  | 27    | 2,89 | 26,98 | 2,8  | 16,15 | 0,08 | 5    | 0    |
| 63  | 23,66 | 4,67 | 22,09 | 5,68 | 20,31 | 0,09 | 4,71 | 0,04 |
| 65  | 17,83 | 2,22 | 14,36 | 1,97 | 19,83 | 0,4  | 4,9  | 0    |
| 66  | 14,66 | 1,59 | 21,95 | 2,74 | 16,26 | 0,42 | 3    | 0    |
| 68  | 29,58 | 4,48 | 44,23 | 1,63 | 20,76 | 0,1  | 5,16 | 0,08 |
| 69  | 20,36 | 2,73 | 29,22 | 2,32 | 20,65 | 0,05 | 5,88 | 0,04 |
| 70  | 20,46 | 1,78 | 25,5  | 1,58 | 20,11 | 0,22 | 5,15 | 0,05 |
| 71  | 23,95 | 2,52 | 29,92 | 1,13 | 16,38 | 0,07 | 5    | 0    |
| 72  | 21,1  | 4,17 | 31,72 | 3,25 | 20,06 | 0,12 | 5,18 | 0,04 |
| 73  | 11,46 | 3,46 | 17,3  | 4,09 | 20,1  | 0    | 5    | 0,06 |
| 74  | 13    | 2,44 | 14,24 | 1,1  | 20,21 | 0,09 | 5,55 | 0,28 |
| 75  | 14,16 | 2,63 | 23    | 3,89 | 20,1  | 0,14 | 5,2  | 0    |
| 76  | 15    | 4,47 | 25,38 | 4,57 | 20,1  | 0,24 | 5,2  | 0    |
| 77  | 19,61 | 1,49 | 27,24 | 2,1  | 19,9  | 0    | 5,2  | 0    |
| 78  | 21,91 | 2,41 | 28,84 | 2,37 | 20,2  | 0,24 | 5,31 | 0,04 |
| 79  | 25    | 2,28 | 34,6  | 4,7  | 20,4  | 0    | 5,48 | 0,2  |
| 80  | 16,2  | 2    | 24,98 | 4,48 | 19,41 | 0,04 | 5    | 0    |
| 81  | 26,08 | 1,85 | 39,48 | 2,76 | 16,61 | 0,04 | 4,95 | 0,05 |
| 82  | 15,05 | 1,9  | 22,53 | 2,15 | 15,5  | 0    | 5    | 0    |
| 83  | 25    | 4,85 | 37,43 | 4,33 | 12,86 | 0,08 | 2,2  | 0    |
| 84  | 20,66 | 4,22 | 33,06 | 7,95 | 16,3  | 0    | 5    | 0    |
| 85  | 19    | 3,09 | 24,91 | 3,65 | 19,5  | 0    | 4,15 | 0,05 |
| 86  | 21,73 | 2,25 | 27,34 | 1,67 | 15,21 | 0,04 | 4,33 | 0,05 |
| 87  | 16,26 | 1,42 | 23,51 | 0,68 | 19,9  | 0,06 | 5,1  | 0    |
| 88  | 21,13 | 1,5  | 29,39 | 2,26 | 19,26 | 0,38 | 5,1  | 0    |
| 89  | 19,96 | 1,67 | 26,11 | 3,22 | 19,9  | 0    | 5,1  | 0    |
| 90  | 14,53 | 1,57 | 21,27 | 2,22 | 19,66 | 0,18 | 5    | 0    |
| 91  | 21    | 2,52 | 29,27 | 4,84 | 20,58 | 0,07 | 5,46 | 0,21 |
| 92  | 16,28 | 0,04 | 4,66  | 0,04 | 18,1  | 0,59 | 4,66 | 0,04 |
| 93  | 15,15 | 2,01 | 22,5  | 3,13 | 17,96 | 0,27 | 5,11 | 0,09 |
| 94  | 20,46 | 1,42 | 33,85 | 3,09 | 20,3  | 0,15 | 5,16 | 0,05 |
| 95  | 19,41 | 1,68 | 30,18 | 5,88 | 20,55 | 0,08 | 5,06 | 0,05 |
| 96  | 20    | 2,22 | 33,4  | 2,49 | 20,66 | 0,05 | 5,1  | 0    |
| 97  | 27,9  | 2,39 | 42,01 | 3,23 | 20,4  | 0,06 | 5,25 | 0,12 |
| 98  | 26,7  | 2,36 | 35    | 2,9  | 18,83 | 0,08 | 4,21 | 0,04 |
| 99  | 18,85 | 1,24 | 27,8  | 3,16 | 17,1  | 0,12 | 5,25 | 1,19 |
| 100 | 12,96 | 2,22 | 18,93 | 1,87 | 16,3  | 0,18 | 4,75 | 0,36 |
| 101 | 18,56 | 2,81 | 24,75 | 4,14 | 14,73 | 0,56 | 4,8  | 0,1  |
| 102 | 30,5  | 3,01 | 41,45 | 2,29 | 19,68 | 0,09 | 5    | 0    |
| 103 | 20,3  | 1,95 | 33,35 | 0,9  | 19,95 | 0,18 | 5,03 | 0,05 |
| 104 | 18,85 | 3,99 | 24,15 | 5,22 | 19,01 | 0,04 | 5,01 | 0,04 |
| 105 | 26,33 | 7,22 | 39,47 | 3,12 | 21,95 | 0,12 | 4,43 | 0,27 |
| 106 | 27,33 | 5    | 37,5  | 5,14 | 20,33 | 0,08 | 5,2  | 0    |
| 107 | 20,81 | 2,63 | 30,36 | 2,46 | 19,88 | 0,58 | 8,05 | 0,51 |
| 108 | 23,66 | 1,36 | 32,66 | 1,27 | 19,88 | 0,04 | 5,1  | 0    |
| 109 | 22,33 | 4,5  | 31,39 | 2,89 | 20,06 | 0,08 | 5,08 | 0,04 |
| 110 | 20,16 | 4,11 | 30,46 | 5,04 | 20,21 | 0,09 | 3,03 | 0,05 |
| 111 | 27,56 | 4,42 | 34,87 | 3,47 | 20,15 | 0,05 | 5,18 | 0,04 |
| 112 | 26    | 5,86 | 39,29 | 8,29 | 20,41 | 0,09 | 5,43 | 0,05 |
| 114 | 31,33 | 2,8  | 53,94 | 6,39 | 16,4  | 0    | 4,96 | 0,08 |
| 115 | 28,33 | 5,6  | 46,09 | 5,63 | 20,26 | 0,22 | 6,3  | 0    |
| 116 | 19,81 | 3,41 | 33,49 | 5,14 | 20,5  | 0    | 5,11 | 0,04 |

|       |        |         |       |      |       |      |      |      |
|-------|--------|---------|-------|------|-------|------|------|------|
| 117   | 15,66  | 3,07    | 23,72 | 4,65 | 18,65 | 0,37 | 5,1  | 0    |
| 118   | 29,16  | 3,43    | 41,61 | 4,28 | 20    | 0    | 5,1  | 0    |
| 119   | 27,5   | 4,96    | 39,63 | 5,05 | 18,46 | 0,05 | 6,26 | 0,05 |
| 120   | 20,83  | 3,65    | 28,89 | 8,46 | 16,18 | 0,09 | 5,3  | 0    |
| 121   | 14,7   | 0,55    | 22,42 | 3,09 | 19,51 | 0,26 | 5,2  | 0    |
| 122   | 37     | 0,89    | 57,72 | 0,92 | 20,35 | 0,05 | 5,3  | 0    |
| 123   | 15,58  | 3,63    | 21,54 | 4,64 | 19,95 | 0,29 | 5,1  | 0    |
| Order | Vt-T x | Vt-T sd | PEEP  | PIP  |       |      |      |      |
| 1     | 22,7   | 1,75    | 5     | 20   |       |      |      |      |
| 2     | 21,36  | 1,14    | 5     | 20   |       |      |      |      |
| 3     | 38,21  | 2,94    | 5     | 20   |       |      |      |      |
| 5     | 28,95  | 1,69    | 5     | 20   |       |      |      |      |
| 7     | 25,72  | 0,38    | 5     | 20   |       |      |      |      |
| 8     | 35,16  | 1,04    | 5     | 20   |       |      |      |      |
| 9     | 34,6   | 1,63    | 5     | 20   |       |      |      |      |
| 10    | 23,15  | 1,05    | 5     | 20   |       |      |      |      |
| 12    | 27,4   | 2,12    | 5     | 20   |       |      |      |      |
| 13    | 29,01  | 1,3     | 5     | 20   |       |      |      |      |
| 14    | 10,01  | 0,59    | 5     | 16   |       |      |      |      |
| 15    | 23,6   | 1,25    | 5     | 20   |       |      |      |      |
| 16    | 31,13  | 1,46    | 5     | 20   |       |      |      |      |
| 17    | 33,82  | 1,48    | 3     | 20   |       |      |      |      |
| 18    | 18,97  | 5,56    | 5     | 20   |       |      |      |      |
| 19    | 25,98  | 1,72    | 5     | 20   |       |      |      |      |
| 20    | 31,71  | 3,14    | 4     | 20   |       |      |      |      |
| 21    | 31     | 1,44    | 5     | 20   |       |      |      |      |
| 22    | 28,58  | 2,04    | 5     | 20   |       |      |      |      |
| 24    | 25,2   | 2,35    | 5     | 15   |       |      |      |      |
| 25    | 24,43  | 0,58    | 5     | 18   |       |      |      |      |
| 26    | 23,86  | 0,4     | 5     | 18   |       |      |      |      |
| 28    | 20,3   | 0,52    | 5     | 20   |       |      |      |      |
| 29    | 19,51  | 0,55    | 5     | 18   |       |      |      |      |
| 30    | 32,96  | 1,96    | 5     | 30   |       |      |      |      |
| 31    | 17,75  | 2,18    | 5     | 15   |       |      |      |      |
| 32    | 27,85  | 0,6     | 5     | 20   |       |      |      |      |
| 33    | 35,03  | 1,01    | 5     | 20   |       |      |      |      |
| 34    | 23,31  | 0,77    | 5     | 15   |       |      |      |      |
| 35    | 22,93  | 2,76    | 5     | 15   |       |      |      |      |
| 36    | 46,26  | 4,51    | 5     | 30   |       |      |      |      |
| 37    | 32,5   | 10,55   | 5     | 20   |       |      |      |      |
| 38    | 37,45  | 1,19    | 5     | 25   |       |      |      |      |
| 39    | 20,03  | 1,05    | 5     | 20   |       |      |      |      |
| 40    | 31,83  | 0,83    | 5     | 20   |       |      |      |      |
| 41    | 36,7   | 2,38    | 5     | 20   |       |      |      |      |
| 42    | 25,91  | 0,45    | 6     | 20   |       |      |      |      |
| 43    | 19,07  | 0,33    | 6     | 18   |       |      |      |      |
| 44    | 32,78  | 1,86    | 5     | 20   |       |      |      |      |
| 45    | 29,53  | 1,79    | 5     | 15   |       |      |      |      |
| 46    | 25,29  | 1,57    | 5     | 15   |       |      |      |      |
| 47    | 20,94  | 3,99    | 5     | 17   |       |      |      |      |
| 48    | 30,38  | 0,85    | 5     | 19   |       |      |      |      |
| 50    | 27,38  | 0,53    | 5     | 20   |       |      |      |      |

|     |       |      |   |    |
|-----|-------|------|---|----|
| 52  | 37,49 | 2,83 | 5 | 20 |
| 53  | 19,68 | 0,26 | 5 | 20 |
| 54  | 33,26 | 1,27 | 5 | 20 |
| 58  | 25,64 | 4,13 | 5 | 18 |
| 59  | 29,63 | 1,76 | 5 | 20 |
| 60  | 29,85 | 2,92 | 5 | 20 |
| 61  | 38,65 | 4,22 | 5 | 20 |
| 62  | 24,52 | 1,33 | 5 | 15 |
| 63  | 47,31 | 2,99 | 5 | 20 |
| 65  | 14,36 | 1,58 | 5 | 20 |
| 66  | 19,91 | 0,85 | 3 | 18 |
| 68  | 21,93 | 0,61 | 5 | 20 |
| 69  | 18,84 | 0,33 | 5 | 20 |
| 70  | 18,54 | 0,35 | 5 | 20 |
| 71  | 14,7  | 0,41 | 5 | 15 |
| 72  | 20,82 | 0,35 | 5 | 20 |
| 73  | 22,23 | 0,35 | 5 | 20 |
| 74  | 20,18 | 0,46 | 5 | 20 |
| 75  | 19,99 | 0,37 | 5 | 20 |
| 76  | 19,41 | 1,03 | 5 | 20 |
| 77  | 17,73 | 0,54 | 5 | 20 |
| 78  | 21,48 | 0,41 | 5 | 20 |
| 79  | 22,29 | 0,19 | 5 | 20 |
| 80  | 20,94 | 0,16 | 5 | 18 |
| 81  | 18,1  | 0,48 | 5 | 15 |
| 82  | 15,25 | 0,25 | 5 | 15 |
| 83  | 15,38 | 0,52 | 2 | 12 |
| 84  | 15,86 | 0,17 | 5 | 15 |
| 85  | 21,11 | 0,47 | 5 | 20 |
| 86  | 14,61 | 0,94 | 5 | 15 |
| 87  | 20,06 | 0,24 | 5 | 20 |
| 88  | 18,17 | 1,04 | 5 | 20 |
| 89  | 20,29 | 0,37 | 5 | 20 |
| 90  | 19,79 | 0,26 | 5 | 20 |
| 91  | 23,28 | 1,65 | 5 | 20 |
| 92  | 18,27 | 0,63 | 5 | 15 |
| 93  | 18,86 | 0,75 | 5 | 18 |
| 94  | 21,86 | 0,34 | 5 | 20 |
| 95  | 23,21 | 0,53 | 5 | 20 |
| 96  | 23    | 0,57 | 5 | 20 |
| 97  | 21,01 | 0,67 | 5 | 20 |
| 98  | 21,11 | 0,24 | 4 | 17 |
| 99  | 17,82 | 0,53 | 5 | 16 |
| 100 | 15,35 | 0,74 | 5 | 20 |
| 101 | 13,73 | 0,74 | 5 | 15 |
| 102 | 19,91 | 0,42 | 5 | 20 |
| 103 | 21,13 | 0,39 | 5 | 20 |
| 104 | 20,23 | 0,18 | 5 | 18 |
| 105 | 26,18 | 0,42 | 4 | 22 |
| 106 | 20,54 | 0,68 | 5 | 20 |
| 107 | 15,53 | 0,74 | 6 | 18 |
| 108 | 20,23 | 0,54 | 5 | 20 |

|     |       |      |   |    |
|-----|-------|------|---|----|
| 109 | 20,69 | 0,69 | 5 | 20 |
| 110 | 25,94 | 0,4  | 3 | 20 |
| 111 | 22,4  | 0,5  | 5 | 20 |
| 112 | 22    | 0,42 | 5 | 20 |
| 114 | 17,03 | 0,63 | 5 | 15 |
| 115 | 19,69 | 0,45 | 6 | 20 |
| 116 | 22,6  | 0,07 | 5 | 20 |
| 117 | 18,14 | 0,28 | 5 | 18 |
| 118 | 22,28 | 0,6  | 5 | 20 |
| 119 | 17,66 | 0,37 | 5 | 15 |
| 120 | 15,74 | 0,31 | 5 | 15 |
| 121 | 20,2  | 0,45 | 5 | 20 |
| 122 | 22,98 | 0,28 | 4 | 20 |
| 123 | 21,9  | 1,14 | 5 | 20 |
