# Supplementary material for: Manual Ventilation and Sustained Lung Inflation in an Experimental Model: Influence of Equipment Type and Operator’s Training
Source: PubMed Central journal article supplement (PMC4747546; doi:10.1371/journal.pone.0148475), 2016-02-09
Supplement: pone.0148475.s003.pdf [file pone.0148475.s003.pdf]

| Order | A PIP B | B PIP B | A PIP Max | B PIP Max | A AUC  | B AUC  | A mean | B mean |
|-------|---------|---------|-----------|-----------|--------|--------|--------|--------|
| 1     | 35,63   | 16,59   | 35,58     | 21,19     | 55,58  | 151,83 | 17,62  | 19,8   |
| 2     | 37,33   | 14,6    | 37,22     | 21,63     | 46,83  | 135,62 | 11,82  | 20,5   |
| 5     | 25,42   | 15,94   | 25,37     | 20,55     | 48,36  | 151,03 | 11,83  | 19,64  |
| 8     | 12,62   | 15,66   | 12,56     | 20,77     | 10,38  | 134,01 | 1,01   | 20,13  |
| 9     | 26,02   | 15,39   | 25,94     | 20,3      | 31,42  | 141,86 | 3,46   | 19,64  |
| 12    | 18,25   | 15,24   | 18,19     | 20,27     | 16,7   | 133,31 | 1,81   | 17,89  |
| 13    | 13,24   | 15,87   | 13,17     | 20,73     | 22,04  | 144,61 | 2,24   | 20     |
| 15    | 27,25   | 15,41   | 27,18     | 20,34     | 64,75  | 147,9  | 6,47   | 19,44  |
| 16    | 26,97   | 15,8    | 26,91     | 20,76     | 46,83  | 152,19 | 4,94   | 20,18  |
| 17    | 23,47   | 17,28   | 23,4      | 20,53     | 53,95  | 162,39 | 5,46   | 20,11  |
| 18    | 18,36   | 15,51   | 18,33     | 20,44     | 41,94  | 158,28 | 4,27   | 19,94  |
| 19    |         | 16,03   |           | 20,57     |        | 174,54 |        | 19,8   |
| 20    | 25,75   | 17,26   | 25,68     | 20,94     | 49,31  | 163,66 | 5,39   | 20,07  |
| 21    | 21,02   | 15,68   | 20,94     | 20,66     | 29,1   | 179,96 | 2,78   | 20,26  |
| 22    | 14,7    | 15,59   | 14,64     | 20,28     | 65,97  | 144,74 | 8,37   | 19,68  |
| 23    |         | 10,54   |           | 15,35     |        | 91,25  |        | 14,51  |
| 24    |         | 15,02   |           | 20,06     |        | 131,09 |        | 19,51  |
| 25    | 26,65   | 15,18   | 26,53     | 20,01     | 55,58  | 150,96 | 5,2    | 19,47  |
| 26    |         |         |           |           |        |        |        |        |
| 28    |         |         |           |           |        |        |        |        |
| 29    | 23,24   | 15,12   | 23,14     | 20,14     | 153,04 | 170,47 | 13,35  | 19,62  |
| 30    |         |         |           |           |        |        |        |        |
| 31    | 32,15   | 15,29   | 32,14     | 20,45     | 157,31 | 140,61 | 13,66  | 18,89  |
| 32    | 24,29   | 17,16   | 24,18     | 22        | 47,07  | 164,98 | 6,31   | 21,36  |
| 33    |         |         |           |           |        |        |        |        |
| 34    | 38,12   | 15,14   | 38,02     | 20,12     | 19,45  | 148,66 | 1,84   | 19,55  |
| 35    | 22,32   | 2,99    | 22,21     | 20,12     | 27,29  | 31,87  | 2,6    | 20,02  |
| 36    |         |         |           |           |        |        |        |        |
| 37    | 23,15   | 17,61   | 23,06     | 22,51     | 53,94  | 166,72 | 5,64   | 21,73  |
| 38    | 28,95   | 17,5    | 28,86     | 22,5      | 38,65  | 185,03 | 3,92   | 22,08  |
| 39    | 17,6    | 15,36   | 17,53     | 20,27     | 28,75  | 146,33 | 3,12   | 19,5   |
| 40    |         |         |           |           |        |        |        |        |
| 41    | 19,27   | 15,23   | 19,19     | 20,19     | 14,39  | 152,9  | 1,64   | 19,81  |
| 42    | 20,52   | 14,54   | 20,45     | 20,35     | 16,61  | 143,88 | 1,62   | 19,93  |
| 43    | 12,52   | 12,52   | 12,45     | 12,45     | 23,94  | 23,94  | 2,34   | 2,38   |
| 44    | 26,17   | 16,85   | 26,11     | 21,72     | 61,5   | 161,6  | 7,5    | 21,24  |
| 45    | 26,57   | 13,6    | 26,5      | 18,56     | 53,43  | 124,95 | 5,31   | 18,03  |
| 46    |         |         |           |           |        |        |        |        |
| 47    | 32,14   | 8,74    | 32,07     | 17,18     | 61,97  | 87,36  | 6,19   | 17,14  |
| 48    | 25,61   | 15,43   | 25,55     | 20,35     | 40,59  | 138,02 | 4,08   | 19,82  |
| 50    |         | 15,57   |           | 20,47     |        | 154,35 |        | 19,89  |
| 52    | 25,8    | 15,65   | 25,74     | 20,47     | 35,32  | 149,23 | 3,3    | 20,08  |
| 53    | 21,75   | 16,83   | 21,63     | 21,78     | 64,65  | 160,26 | 6,5    | 21,12  |
| 54    | 20,62   | 15,36   | 20,55     | 20,28     | 13,16  | 146,08 | 1,25   | 19,53  |
| 58    | 24,75   | 15,63   | 24,67     | 20,62     | 25,56  | 136    | 2,51   | 18,54  |
| 59    |         |         |           |           |        |        |        |        |
| 60    | 37,1    | 14,75   | 37,12     | 19,6      | 18,89  | 124,48 | 1,94   | 17,3   |
| 61    |         |         |           |           |        |        |        |        |
| 63    | 30,67   | 15,71   | 30,61     | 20,61     | 16,9   | 141,16 | 1,65   | 19,04  |
| 65    |         | 15,46   |           | 20,32     |        | 146,86 |        | 18,58  |
| 68    | 39      | 16,05   | 38,83     | 21,06     | 73,44  | 149,48 | 8,05   | 20,72  |

|     |       |       |       |       |        |         |       |       |
|-----|-------|-------|-------|-------|--------|---------|-------|-------|
| 69  | 29,86 | 16,21 | 29,75 | 21,2  | 120,4  | 156,4   | 12    | 20,7  |
| 70  | 18,43 | 15,64 | 18,32 | 20,91 | 58,86  | 151,4   | 5,81  | 20,48 |
| 71  |       | 12,04 |       | 16,94 |        | 116,61  |       | 16,61 |
| 72  | 29,81 | 15,32 | 29,73 | 20,28 | 126,01 | 145,52  | 12,57 | 19,58 |
| 73  | 17,45 | 15,48 | 17,36 | 20,23 | 46,69  | 149     | 4,6   | 19,75 |
| 74  | 18,78 | 15,65 | 18,69 | 20,64 | 45,71  | 150,08  | 4,51  | 20,06 |
| 75  |       |       |       |       |        |         |       |       |
| 76  | 18,04 | 15,78 | 17,97 | 20,79 | 41,63  | 148,56  | 4,12  | 20,4  |
| 77  | 20,99 | 15,75 | 20,91 | 20,62 | 54,4   | 152,32  | 5,39  | 20,16 |
| 78  |       | 15,59 |       | 20,59 |        | 150,67  |       | 20,12 |
| 79  |       |       |       |       |        |         |       |       |
| 80  | 19,86 | 15,58 | 19,8  | 20,39 | 76,93  | 151,71  | 7,77  | 20,03 |
| 81  |       |       |       |       |        |         |       |       |
| 82  | 18,5  | 10,85 | 18,45 | 15,67 | 62,19  | 103,57  | 6,22  | 15,22 |
| 83  | 15,76 | 18,15 | 15,71 | 20,32 | 36,3   | 180,61  | 3,58  | 19,89 |
| 84  |       |       |       |       |        |         |       |       |
| 85  | 20,56 | 16,36 | 20,53 | 20,21 | 143,44 | 160,02  | 14,46 | 19,87 |
| 86  | 29,7  | 14,8  | 29,69 | 20,41 | 144,33 | 143,82  | 14,42 | 20    |
| 88  | 25,64 | 15,14 | 25,61 | 20,15 | 105,13 | 133,77  | 10,53 | 19,68 |
| 89  | 17,57 | 15,37 | 17,54 | 20,24 | 65,22  | 136,49  | 7,12  | 19,85 |
| 90  | 23,25 | 15,19 | 23,32 | 20,04 | 117,73 | 141,3   | 11,94 | 19,37 |
| 91  |       | 15,66 |       | 20,77 |        | 145,6   |       | 19,87 |
| 92  | 28,96 | 11,87 | 28,94 | 16,38 | 92,93  | 107,67  | 9,34  | 15,63 |
| 93  | 27,07 | 16,33 | 27,05 | 21,31 | 134,21 | 159,112 | 13,1  | 20,9  |
| 94  | 17,87 | 15,86 | 17,84 | 20,84 | 18,58  | 148,79  | 1,85  | 20,05 |
| 95  | 38,59 | 15,86 | 38,57 | 20,8  | 97,3   | 154,59  | 9,71  | 20,38 |
| 96  | 19,11 | 16,09 | 19,11 | 20,98 | 140,53 | 144,98  | 14,56 | 20,51 |
| 97  | 32,01 | 15,77 | 32    | 20,6  | 72,35  | 144,89  | 7,59  | 19,98 |
| 98  | 30,93 | 15,17 | 30,91 | 19,34 | 87,96  | 137,04  | 8,87  | 17,89 |
| 99  | 21,64 | 12,86 | 21,64 | 17,37 | 120,99 | 123,8   | 12,07 | 16,95 |
| 100 | 16,76 | 12,42 | 17,05 | 16,82 | 118,42 | 120,9   | 12,12 | 16,48 |
| 101 | 15,45 | 10,59 | 15,44 | 15,48 | 102,03 | 99,12   | 11,09 | 15,22 |
| 102 | 25,59 | 15,37 | 25,59 | 20,13 | 112,49 | 149,11  | 11,27 | 19,72 |
| 103 | 19,95 | 15,41 | 19,94 | 20,22 | 69,14  | 148,22  | 6,95  | 19,73 |
| 104 |       | 17,45 |       | 21,36 |        | 165,49  |       | 20,64 |
| 106 | 26,65 | 15,9  | 26,58 | 20,86 | 92,48  | 155,84  | 9,19  | 20,56 |
| 107 | 37,87 | 12,82 | 37,8  | 20,36 | 120,76 | 123,71  | 12,12 | 20    |
| 108 | 25,97 | 15,74 | 25,9  | 20,52 | 44,19  | 152,31  | 4,4   | 20,1  |
| 109 | 32,6  | 15,64 | 32,5  | 20,52 | 117,51 | 151,32  | 11,69 | 20,06 |
| 110 | 10,94 | 17,61 | 10,88 | 20,48 | 28,84  | 147,8   | 2,84  | 17,67 |
| 111 | 20,43 | 15,36 | 20,36 | 20,32 | 70,68  | 148,22  | 7,01  | 19,83 |
| 112 | 23,63 | 15,39 | 23,67 | 20,6  | 40     | 147,53  | 4,05  | 20,03 |
| 113 |       |       |       |       |        |         |       |       |
| 114 | 33,93 | 11,93 | 33,94 | 16,67 | 167,93 | 115,75  | 16,82 | 16,33 |
| 115 | 27,66 | 14,46 | 27,62 | 20,37 | 125,82 | 141,17  | 12,56 | 20,04 |
| 116 | 29,19 | 15,9  | 29,16 | 20,79 | 76,26  | 154,96  | 7,27  | 20,4  |
| 117 |       | 15,43 |       | 20,33 |        | 149,78  |       | 19,93 |
| 118 | 23,5  | 15,36 | 23,56 | 20,45 | 159,61 | 143,46  | 16,09 | 19,49 |
| 119 | 31,91 | 14,44 | 31,88 | 20,51 | 63,35  | 55,5    | 6,32  | 11,65 |
| 120 | 12,66 | 15,11 | 12,63 | 20,3  | 27,11  | 146,13  | 2,71  | 19,81 |
| 121 | 17,22 | 14,88 | 17,2  | 19,95 | 78,25  | 138,97  | 7,81  | 19,02 |
| 122 | 30,03 | 15,69 | 30,02 | 20,64 | 141,1  | 152,44  | 14,12 | 20,2  |

| Order | 123    | 12,75  | 15,67   | 12,72   | 20,63 | 23,51 | 150,62 | 2,33 | 20,05 |
|-------|--------|--------|---------|---------|-------|-------|--------|------|-------|
|       | A Tmax | B Tmax | A basel | B basel |       |       |        |      |       |
| 1     | 1,06   | 10,03  | 0       | 4,58    |       |       |        |      |       |
| 2     | 0,6    | 1,2    | 0       | 7,03    |       |       |        |      |       |
| 5     | 0,84   | 8,58   | 0       | 4,61    |       |       |        |      |       |
| 8     | 0,52   | 9      | 0       | 5,12    |       |       |        |      |       |
| 9     | 0,95   | 5,71   | 0       | 4,91    |       |       |        |      |       |
| 12    | 1,65   | 0,96   | 0       | 5,03    |       |       |        |      |       |
| 13    | 1,67   | 9,58   | 0       | 4,86    |       |       |        |      |       |
| 15    | 1,1    | 5,26   | 0       | 4,93    |       |       |        |      |       |
| 16    | 0,95   | 8,3    | 0       | 4,95    |       |       |        |      |       |
| 17    | 0,55   | 8,29   | 0       | 3,46    |       |       |        |      |       |
| 18    | 1,04   | 8,45   | 0       | 4,93    |       |       |        |      |       |
| 19    |        | 11,19  |         | 4,54    |       |       |        |      |       |
| 20    | 1,76   | 10,04  | 0       | 3,68    |       |       |        |      |       |
| 21    | 0,96   | 11,98  | 0       | 4,97    |       |       |        |      |       |
| 22    | 2,74   | 6,66   | 0       | 4,69    |       |       |        |      |       |
| 23    |        | 9,76   |         | 4,81    |       |       |        |      |       |
| 24    |        | 9,77   |         | 5,03    |       |       |        |      |       |
| 25    | 0,64   | 10,28  | 0       | 4,83    |       |       |        |      |       |
| 26    |        |        |         |         |       |       |        |      |       |
| 28    |        |        |         |         |       |       |        |      |       |
| 29    | 1,14   | 10,87  | 0       | 5,02    |       |       |        |      |       |
| 30    |        |        |         |         |       |       |        |      |       |
| 31    | 0,5    | 9,18   | 0       | 5,16    |       |       |        |      |       |
| 32    | 0,88   | 8,8    | 0       | 4,84    |       |       |        |      |       |
| 33    |        |        |         |         |       |       |        |      |       |
| 34    | 0,37   | 10,3   | 0       | 4,96    |       |       |        |      |       |
| 35    | 1,1    | 9,33   | 0       | 17,136  |       |       |        |      |       |
| 36    |        |        |         |         |       |       |        |      |       |
| 37    | 1,68   | 3,54   | 0       | 4,9     |       |       |        |      |       |
| 38    | 1      | 2,83   | 0       | 5       |       |       |        |      |       |
| 39    | 1,45   | 6,53   | 0       | 4,91    |       |       |        |      |       |
| 40    |        |        |         |         |       |       |        |      |       |
| 41    | 2,04   | 10,34  | 0       | 4,95    |       |       |        |      |       |
| 42    | 0,66   | 6,83   | 0       | 5,81    |       |       |        |      |       |
| 43    | 0,83   | 0,97   | 0       | 0       |       |       |        |      |       |
| 44    | 2,4    | 1,66   | 0       | 4,87    |       |       |        |      |       |
| 45    | 0,59   | 4,82   | 0       | 4,97    |       |       |        |      |       |
| 46    |        |        |         |         |       |       |        |      |       |
| 47    | 0,58   | 8      | 0       | 8,44    |       |       |        |      |       |
| 48    | 1,08   | 9,72   | 0       | 4,92    |       |       |        |      |       |
| 50    |        | 9,5    |         | 4,91    |       |       |        |      |       |
| 52    | 0,72   | 4,45   | 0       | 4,83    |       |       |        |      |       |
| 53    | 1,2    | 9,42   | 0       | 4,95    |       |       |        |      |       |
| 54    | 0,91   | 2,3    | 0       | 4,92    |       |       |        |      |       |
| 58    | 0,53   | 0,4    | 0       | 5       |       |       |        |      |       |
| 59    |        |        |         |         |       |       |        |      |       |
| 60    | 0,47   | 4,8    | 0,02    | 4,83    |       |       |        |      |       |
| 61    |        |        |         |         |       |       |        |      |       |
| 63    | 0,48   | 0,37   | 0       | 4,9     |       |       |        |      |       |
| 65    |        | 0,29   |         | 4,85    |       |       |        |      |       |

|     |      |       |      |      |
|-----|------|-------|------|------|
| 68  | 0,52 | 6,52  | 0    | 5,01 |
| 69  | 0,92 | 8,54  | 0    | 5    |
| 70  | 0,73 | 9,9   | 0    | 5,27 |
| 71  |      | 9,33  |      | 4,9  |
| 72  | 0,7  | 9,96  | 0    | 4,96 |
| 73  | 0,4  | 10,05 | 0    | 4,75 |
| 74  | 0,7  | 8,29  | 0    | 5    |
| 75  |      |       |      |      |
| 76  | 0,86 | 9,3   | 0    | 5,01 |
| 77  | 0,52 | 7,9   | 0    | 4,87 |
| 78  |      | 9,38  |      | 5    |
| 79  |      |       |      |      |
| 80  | 0,88 | 9,71  | 0    | 4,81 |
| 81  |      |       |      |      |
| 82  | 0,44 | 6,72  | 0    | 4,82 |
| 83  | 0,51 | 5,83  | 0    | 2,17 |
| 84  |      |       |      |      |
| 85  | 0,5  | 7,43  | 0    | 3,85 |
| 86  | 0,66 | 3,52  | 0    | 5,61 |
| 88  | 0,97 | 6,05  | 0    | 5    |
| 89  | 0,39 | 8,3   | 0    | 4,88 |
| 90  | 0,78 | 6,66  | 0    | 4,86 |
| 91  |      | 6,77  |      | 5,12 |
| 92  | 0,72 | 7,29  | 0    | 4,51 |
| 93  | 0,53 | 9,71  | 0    | 5    |
| 94  | 0,75 | 9,19  |      | 5    |
| 95  | 0,39 | 7,35  | 0    | 4,94 |
| 96  | 2,91 | 8,18  | 0    | 4,89 |
| 97  | 0,72 | 6,38  | 0    | 4,81 |
| 98  | 0,63 | 6,75  | 0    | 4,17 |
| 99  | 1,01 | 8,17  | 0    | 4,5  |
| 100 | 0,29 | 5,98  | 0,29 | 4,4  |
| 101 | 1,34 | 8,62  | 0    | 4,89 |
| 102 | 0,57 | 9,36  | 0    | 4,76 |
| 103 | 0,9  | 3,72  | 0    | 4,81 |
| 104 |      | 6,08  |      | 3,91 |
| 106 | 0,48 | 7,66  | 0    | 4,96 |
| 107 | 0,37 | 8,13  | 0    | 7,54 |
| 108 | 0,85 | 5,63  | 0    | 4,78 |
| 109 | 1,15 | 9,11  | 0    | 4,88 |
| 110 | 3,07 | 8,75  | 0    | 2,87 |
| 111 | 0,46 | 9,44  | 0    | 4,96 |
| 112 | 0,27 | 9,64  | 0    | 5,21 |
| 113 |      |       |      |      |
| 114 | 0,31 | 8,43  | 0    | 4,74 |
| 115 | 0,38 | 9,05  | 0    | 5,91 |
| 116 | 0,78 | 9,31  | 0    | 4,89 |
| 117 |      | 7,44  | 0    | 4,9  |
| 118 | 1,31 | 9,44  | 0    | 5,08 |
| 119 | 0,71 | 9,93  | 0    | 6    |
| 120 | 0,54 | 7,2   | 0    | 5,18 |
| 121 | 1,39 | 9,94  | 0    | 5    |

|     |      |      |   |      |
|-----|------|------|---|------|
| 122 | 1,21 | 8,72 | 0 | 4,94 |
| 123 | 0,53 | 9,48 | 0 | 4,96 |
